# Supplementary material for: Label-Free Direct Detection of Saxitoxin Based on a Localized Surface Plasmon Resonance Aptasensor
Source: PubMed Central journal article supplement (PMC6563244; doi:10.3390/toxins11050274), 2019-05-15
Supplement: toxins-11-00274-s001.pdf [file toxins-11-00274-s001.pdf]

# Supplementary Materials: Label-free direct detection of saxitoxin based on a localized surface plasmon resonance aptasensor

Su-Ji Ha, Jin-Ho Park, Bobin Lee and Min-Gon Kim

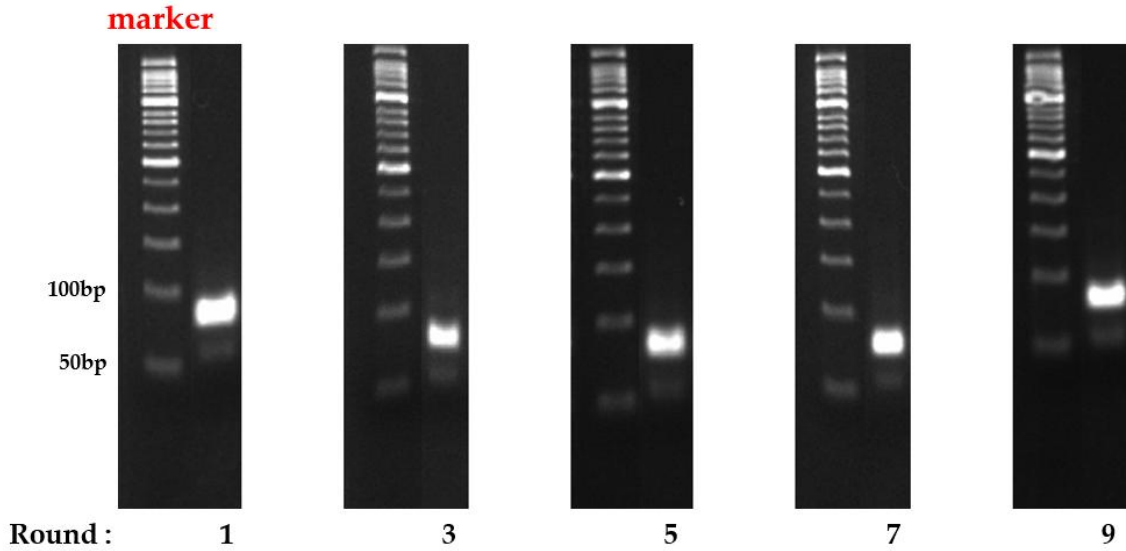

Figure S1. Agarose gel images of the GO-SELEX rounds (76mer = random sequence library size).

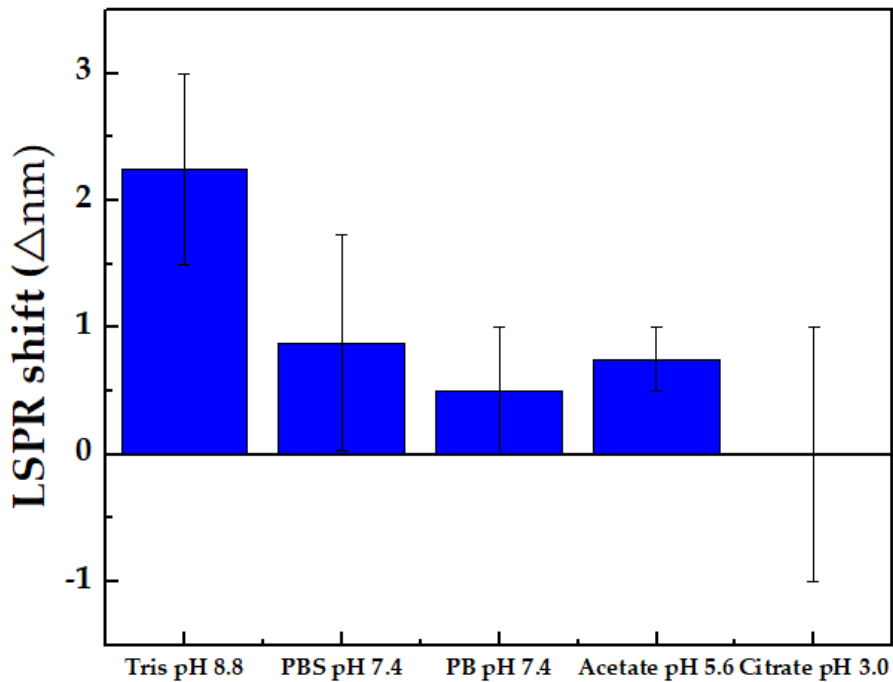

Figure S2. Comparison of non-specific absorption to LSPR chip fixed with only poly T<sub>3</sub> spacers (n = 3).

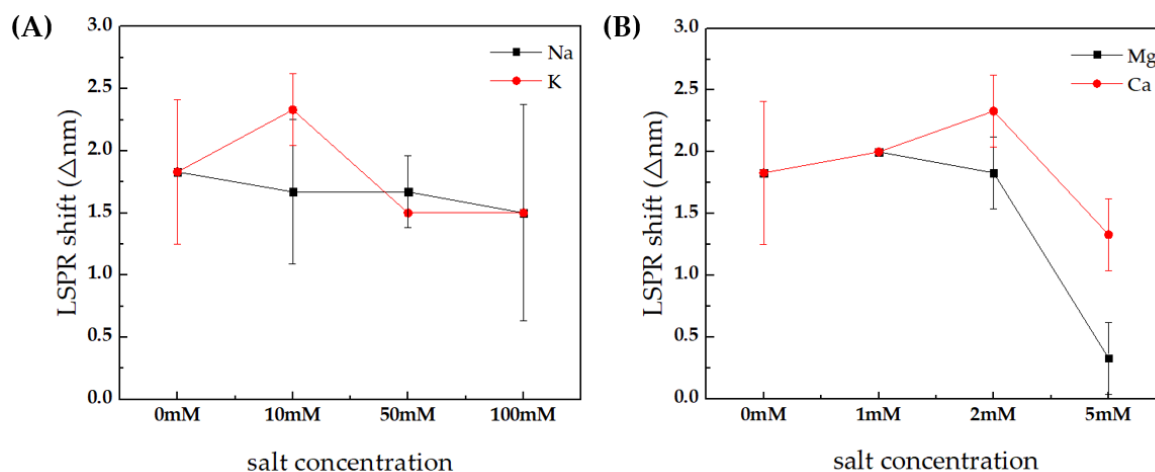

**Figure S3.** Comparison of the effect of salts used in the working buffer. (A) The LSPR shift of the monovalent cations. (B) The LSPR shift of the divalent cations. (n = 3).

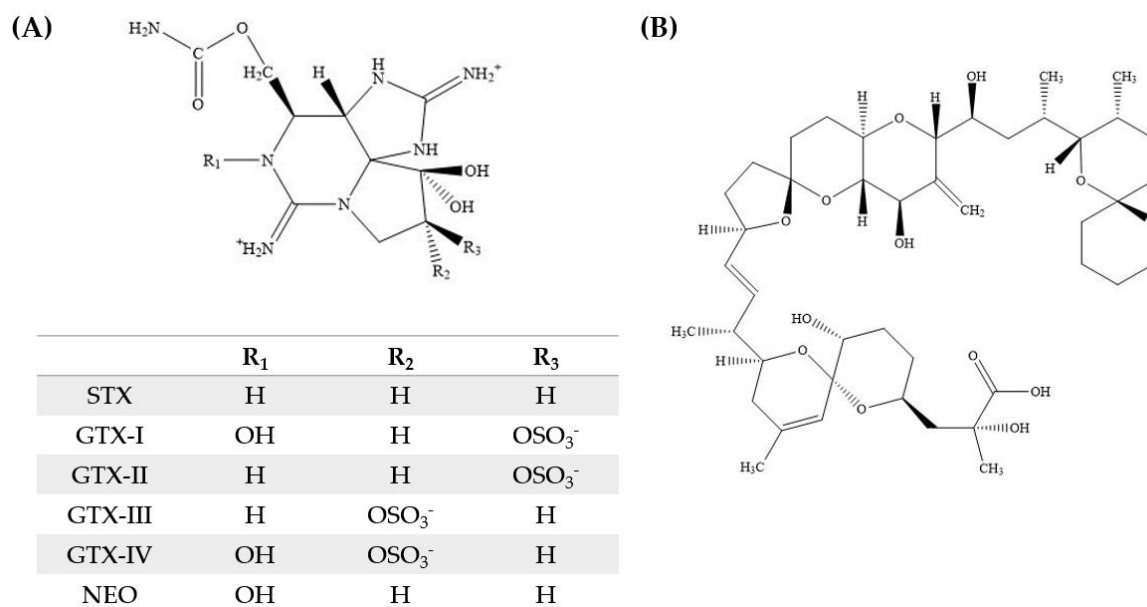

**Figure S4.** Chemical structure of STX analogs. (A) GTX complex and neoSTX. (B) Okadaic acid.

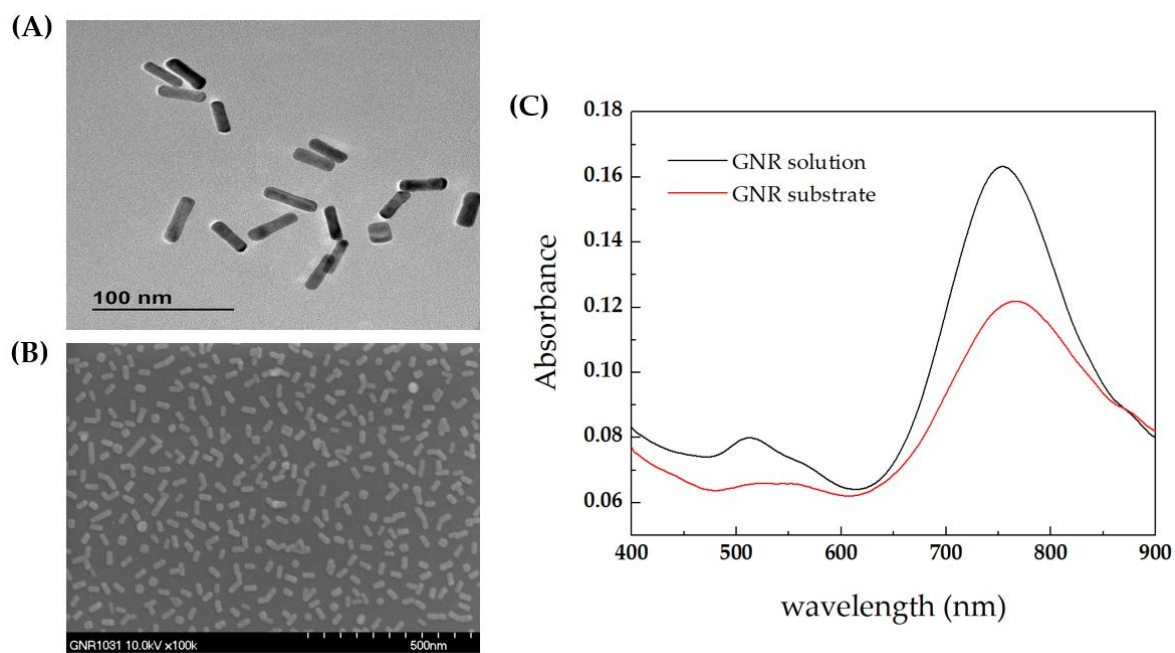

**Figure S5.** (A) TEM image of the synthesized GNR solution. (B) SEM image of the GNR chip. (C) Absorption spectra of GNR solution (black) and GNR immobilized on the chip (red).
